# Supplementary material for: Loss of PGRMC1 Delays the Progression of Hepatocellular Carcinoma via Suppression of Pro-Inflammatory Immune Responses
Source: MDPI journal article supplement (doi:10.3390/cancers13102438), 2021-05-18
Supplement: s1 [file s1]

## Supplementary Figures

# **Loss of PGRMC1 delays the progression of hepatocellular carcinoma via suppression of pro-inflammatory immune responses**

**Sang R. Lee<sup>1#</sup>, Jong Geol Lee<sup>2#</sup>, Jun H. Heo<sup>1</sup>, Seong Lae Jo<sup>1</sup>, Jihoon Ryu<sup>1</sup>, Globinna Kim<sup>2</sup>, Jung-Min Yon<sup>2</sup>, Myeong Sup Lee<sup>3</sup>, Geun-Shik Lee<sup>4</sup>, Beum-Soo An<sup>5</sup>, Hyun-Jin Shin<sup>1</sup>, Dong-Cheol Woo<sup>2</sup>, In-Jeoung Baek<sup>2\*</sup>, and Eui-Ju Hong<sup>1\*</sup>**

#: These authors equally contributed to the study.

\*Address correspondence to:

In-Jeoung Baek, DVM, PhD

Department of Convergence Medicine

Asan Medical Center, University of Ulsan College of Medicine

88, Olympic-ro 43-gil, Songpa-gu, Seoul 05505, Korea

Phone: +82-2-3010-2798; Fax: +82-2-3010-4197; Email: [ijbaek@amc.seoul.kr](mailto:ijbaek@amc.seoul.kr)

Eui-Ju Hong, DVM, PhD

College of Veterinary Medicine, Chungnam National University

99 Daehak-ro, Yuseong-gu, Daejeon 34134, Korea

Phone: +82-42-821-6781; Fax: +82-42-821-8903; Email: [ejhong@cnu.ac.kr](mailto:ejhong@cnu.ac.kr)

WT + DEN

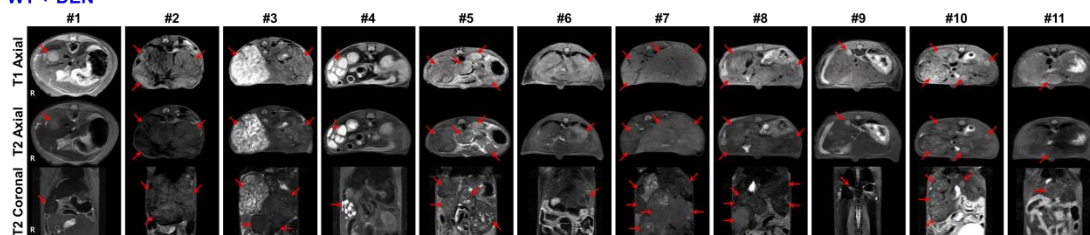

*Pgrmc1*-null + DEN

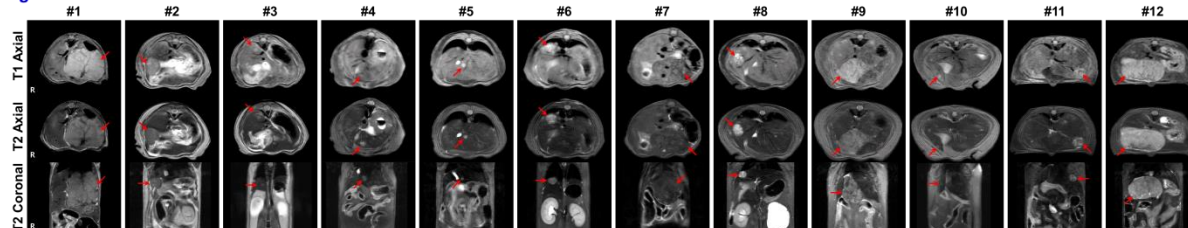

**Figure S1.** Magnetic resonance images (T1w [axial], T2w [axial and coronal]) of HCCs in HCC-bearing WT (n=11) and *Pgrmc1*-null (n=12) mice. Arrows denote the tumors.

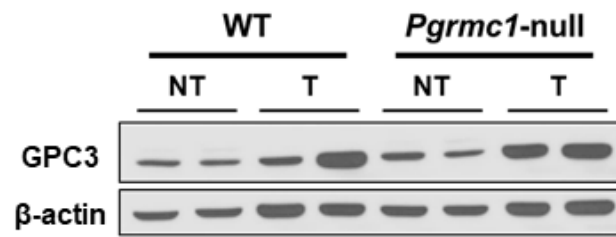

**Figure S2.** Western blot analysis of Glypican-3 (GPC3) in non-tumor lesions and tumors of WT and *Pgrmc1*-null mice. β-actin was used as an internal control. NT, non-tumor; T, tumor region

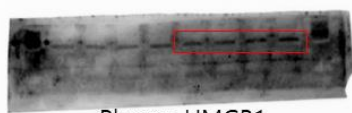

Fig. 3C

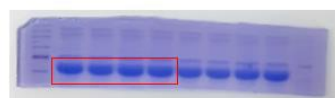

Fig. 3C

Plasma albumin

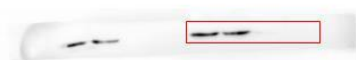

Fig. 4A

PGRMC1

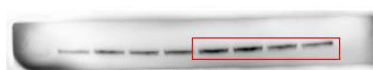

Fig. 4A

EGFR

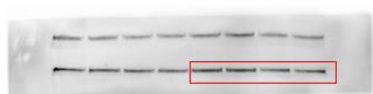

Fig. 4A

pEGFR

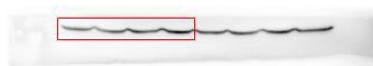

Fig. 4A

β-actin

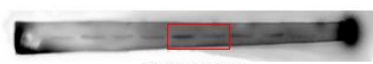

Fig. 6A

PGRMC1

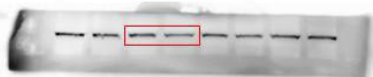

Fig. 6A

EGFR

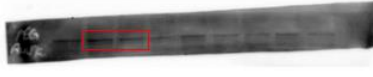

Fig. 6A

pEGFR

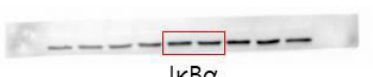

Fig. 6A

IκBα

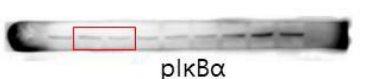

Fig. 6A

pIκBα

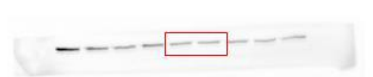

Fig. 6A

NF-κB (p65)

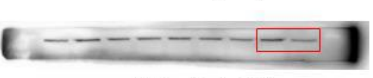

Fig. 6A

pNF-κB (p65)

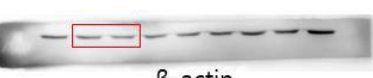

Fig. 6A

β-actin

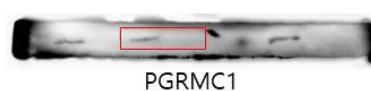

Fig. 4C

PGRMC1

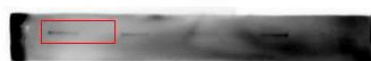

Fig. 4C

EGFR

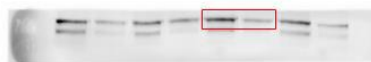

Fig. 4C

pEGFR

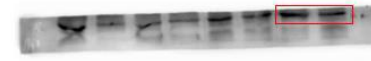

Fig. 4C

β-actin

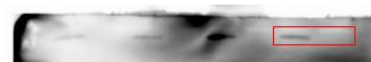

Fig. 4D

PGRMC1

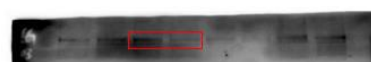

Fig. 4D

EGFR

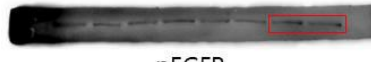

Fig. 4D

pEGFR

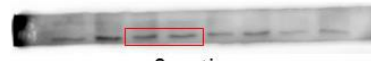

Fig. 4D

β-actin

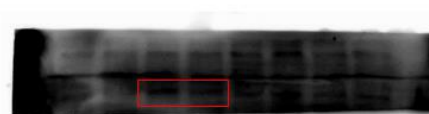

Fig. 6C

PGRMC1

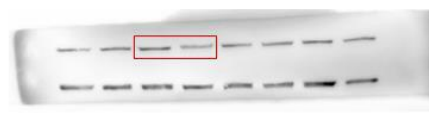

Fig. 6C

EGFR

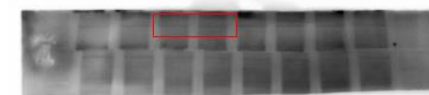

Fig. 6C

pEGFR

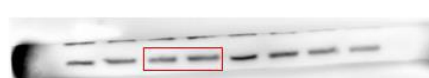

Fig. 6C

IκBα

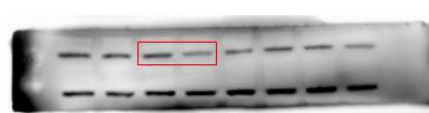

Fig. 6C

pIκBα

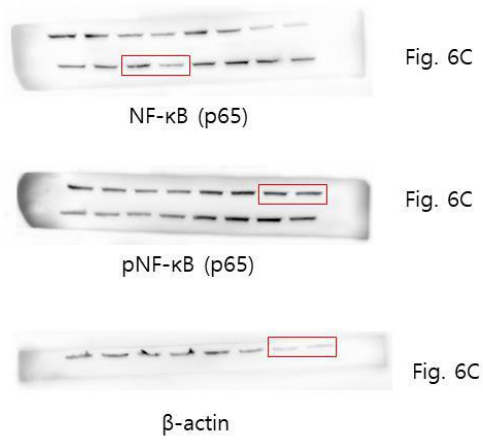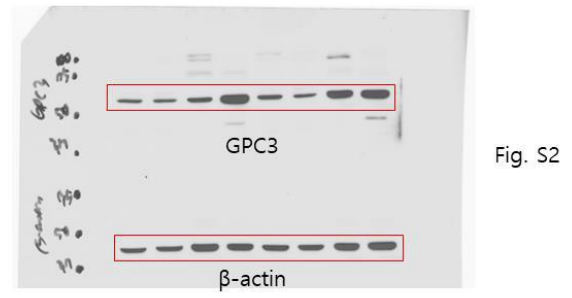

**Figure S3** Full blot images.

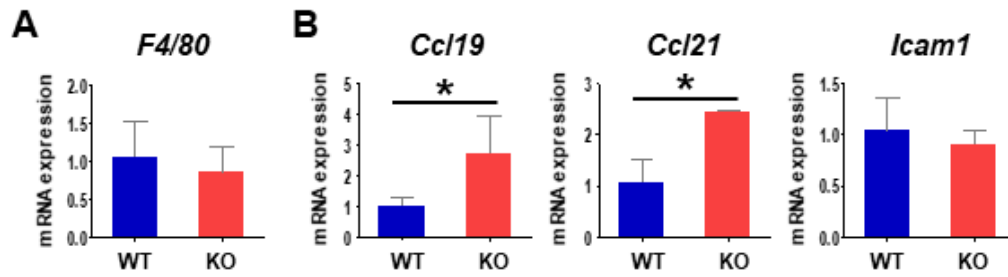

**Figure S4.** mRNA expression levels of *F4/80*, *Ccl19*, *Ccl21*, and *Icam1* in the livers of DEN-injected WT and *Pgrmc1*-null mice. The expression levels were normalized to that of *Rplp0* and expressed relative to the WT group. \* $p < 0.05$  in Student's *t*-test.

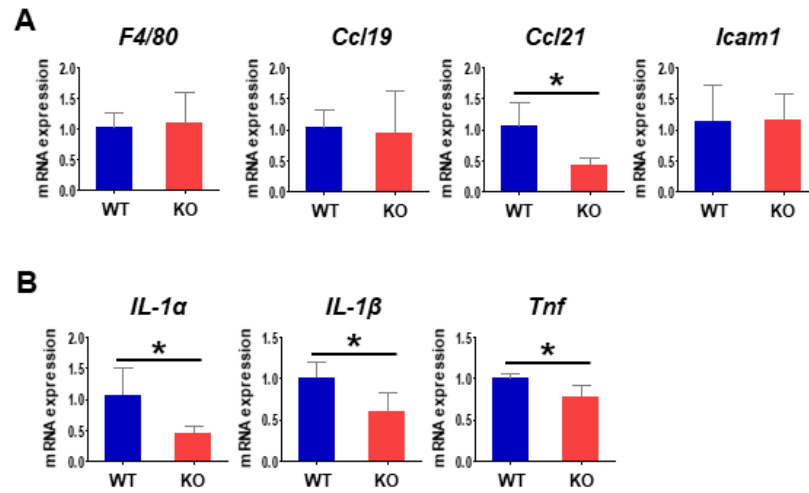

**Figure S5.** mRNA expression levels of *F4/80*, *Ccl19*, *Ccl21*, *Icam1*, *IL-1α*, *IL-1β*, and *Tnf* in the HCC of DEN-injected WT and *Pgrmc1*-null mice. The expression levels were normalized to that of *Rplp0* and expressed relative to the WT group. \* $p < 0.05$  in Student's *t*-test.

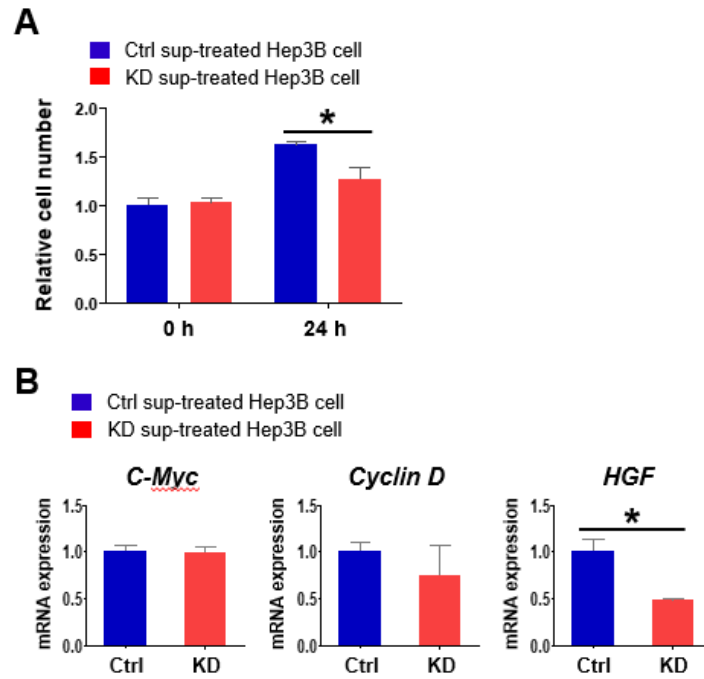

**Figure S6.** Cancer cell proliferation measured after treatment of Raw264.7 cell culture supernatant. (A) Cell number counted by trypan blue staining in 0 and 24 h treatment of Raw264.7 cell culture supernatant to Hep3B cells. FBS was excluded in Hep3B cell culture medium. Cell culture supernatant was collected from Control (Ctrl) or Pgrmc1-siRNA (KD)-transfected Raw 264.7 cells treated with necrotic debris for 3 h. (B) mRNA expression levels of *C-Myc*, *Cyclin D*, and *HGF* in Hep3B cells cultured with Raw 264.7 cell culture supernatant. Cell culture supernatant was collected from Control (Ctrl) or Pgrmc1-siRNA (KD)-transfected Raw 264.7 cells treated with necrotic debris for 3 h. Cell culture supernatant was incubated for 3 h in Hep3B cells. \* $p < 0.05$  in Student's *t*-test.



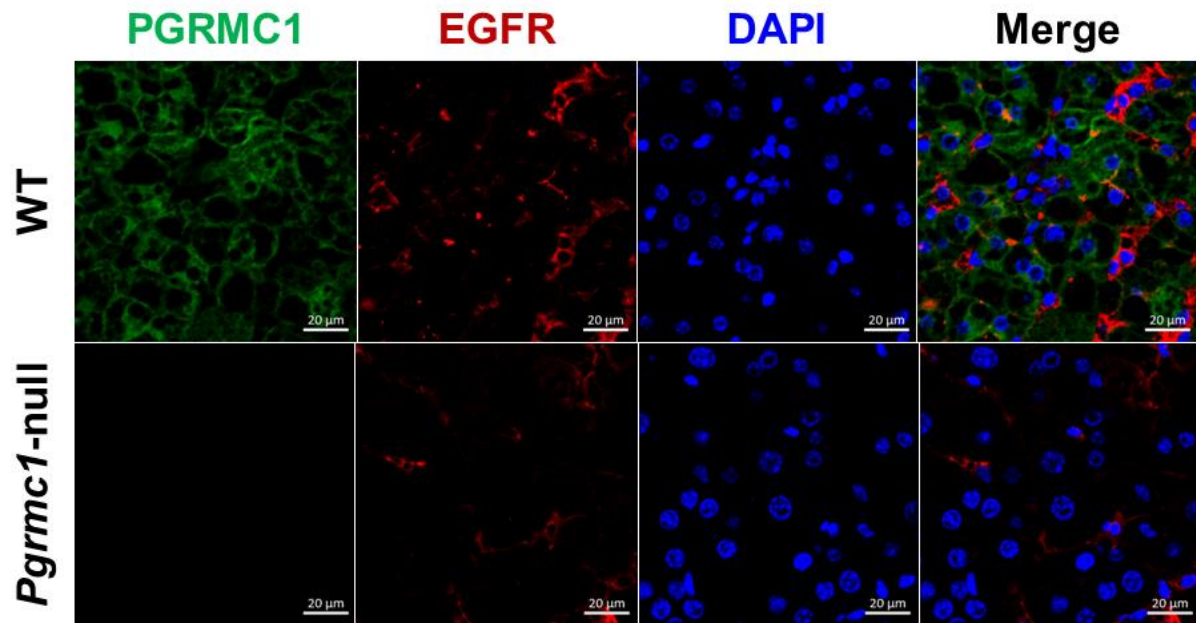

**Figure S7.** Co-immunostaining of PGRMC1 and EGFR in the HCC of WT mice and *Pgrmc1*-null mice. PGRMC1 (green) and EGFR (red) were stained with the corresponding antibodies. DAPI (blue) was used for nuclear staining.

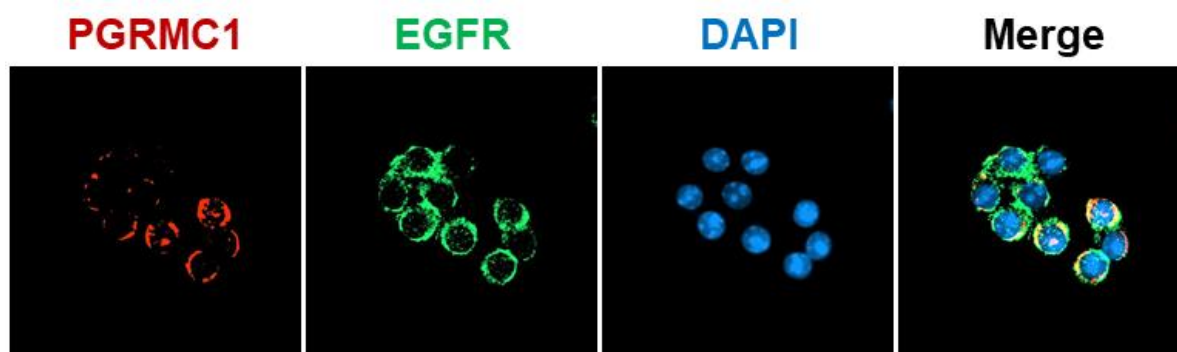

### Raw264.7 cell

**Figure S8.** Co-immunostaining of PGRMC1 and EGFR in Raw 264.7 cell. PGRMC1 (red) and EGFR (green) were stained with the corresponding antibodies. DAPI (blue) was used for nuclear staining.
